# Supplementary material
Source: PubMed Central journal article supplement (PMC6325228)
Supplement: 8599681a83ade01902fac6f322d948b4_AAC.01337-18-s0001.pdf [file 8599681a83ade01902fac6f322d948b4_AAC.01337-18-s0001.pdf]

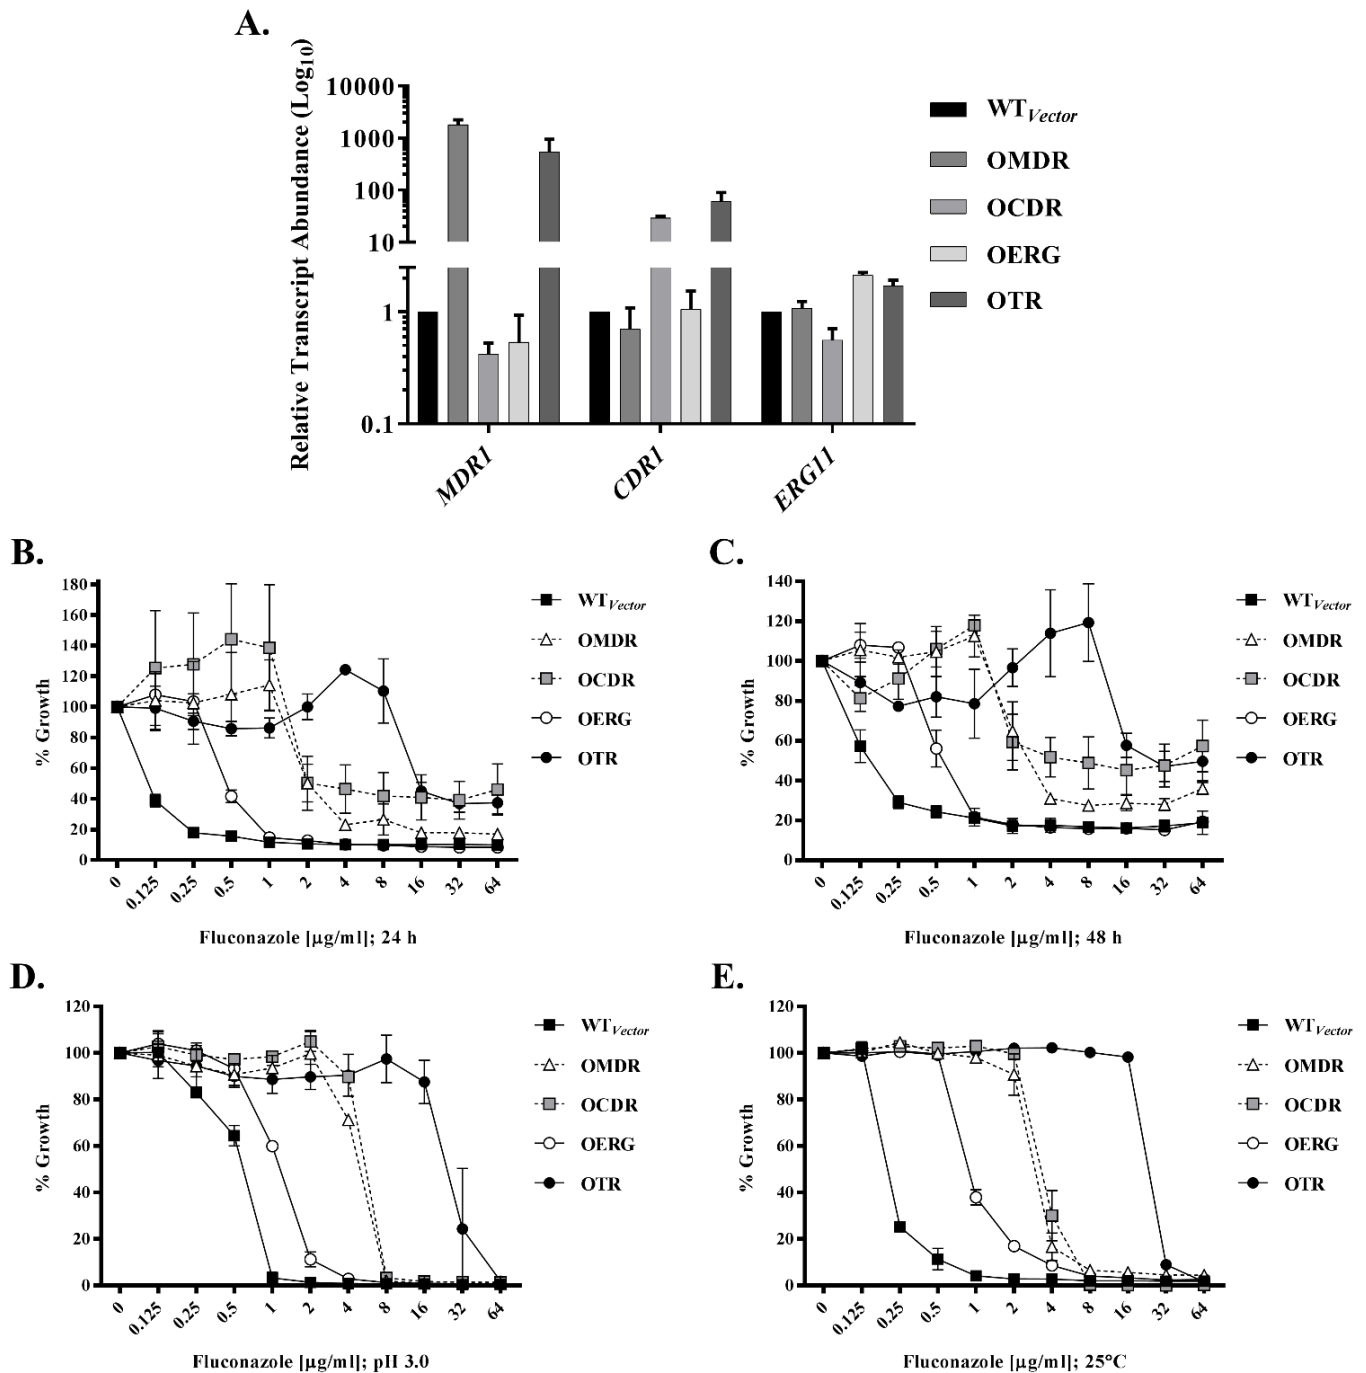

**Supplemental Figure 1. Azole resistance due to overexpression of efflux pumps or Erg11p is not eliminated under conditions that abolish trailing growth.** The wild-type (WT<sub>Vector</sub>, XCTRL), OMDR (overexpressing Cdr1p), OMDR (overexpressing Mdr1p), OERG (overexpressing Erg11p), and OTR (overexpressing Cdr1p, Mdr1p and Erg11p) strains were grown overnight in YPD at 30°C then sub-cultured to an  $\text{OD}_{600\text{nm}}$  of 0.2 and then incubated at 30°C with shaking for 6 hours. RNA was then extracted and *MDR1*, *CDR1*, and *ERG11* transcript abundance quantified by qRT-PCR using the  $2^{-\Delta\Delta CT}$  method, and normalized to that of

*ACT1* for each sample (A). The mean and standard error of the mean from two biological replicates, each with technical triplicates are shown for each strain. Relative transcript levels for each gene are expressed relative to the wild-type ( $WT_{vector}$ ) strain. The susceptibility of the wild-type ( $WT_{vector}$ ), OCDR (overexpressing *Cdr1p*), OMDR (overexpressing *Mdr1p*), OERG (overexpressing *Erg11p*), and OTR (overexpressing *Cdr1p*, *Mdr1p* and *Erg11p*) to fluconazole was evaluated using the CLSI broth microdilution protocol. Growth was measured as  $OD_{600nm}$  after 24 (B) or 48 (C) hours and expressed as a percentage of the growth in the minus drug (DMSO alone) control wells for each strain. Fluconazole susceptibility was also evaluated with RPMI medium with a pH of 3.0 (D), or with incubation at 25°C (E) and growth was compared after 48 hours of incubation. The mean  $\pm$  standard deviation of three biological replicates are indicated.

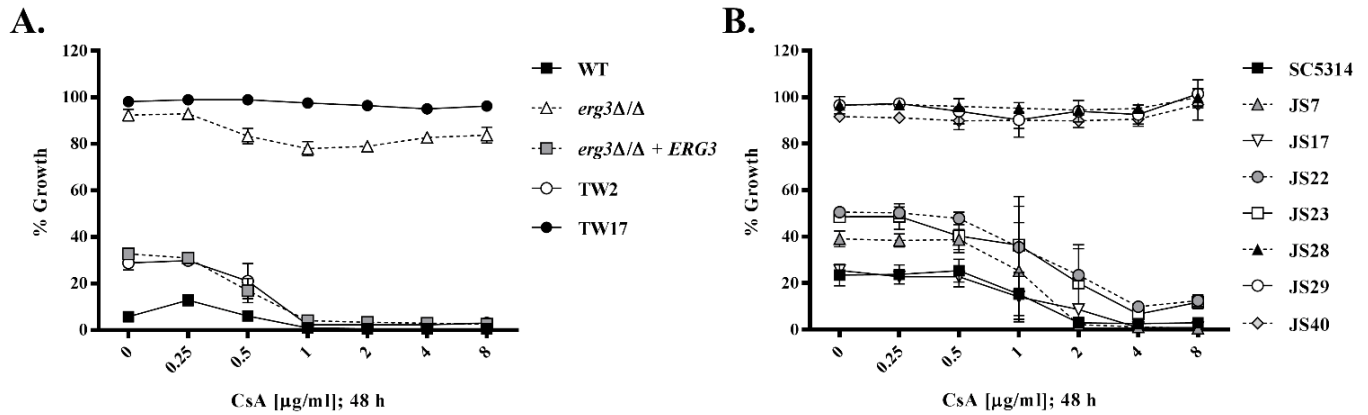

**Supplemental Figure 2. Growth of the *Candida albicans* *erg3* $\Delta/\Delta$  mutant in the presence of fluconazole does not depend upon calcineurin signaling.** The growth of the indicated strains was compared in dose response experiments with the calcineurin inhibitor cyclosporine A (CsA) in the absence or presence of 1  $\mu\text{g/ml}$  fluconazole, according to the conditions in the CLSI broth microdilution protocol. The growth of each strain was measured as OD<sub>600nm</sub> after 48 hours incubation and expressed as a percentage of the growth in the minus drug (DMSO) control wells. The mean  $\pm$  standard deviation of three biological replicates is shown in each panel.

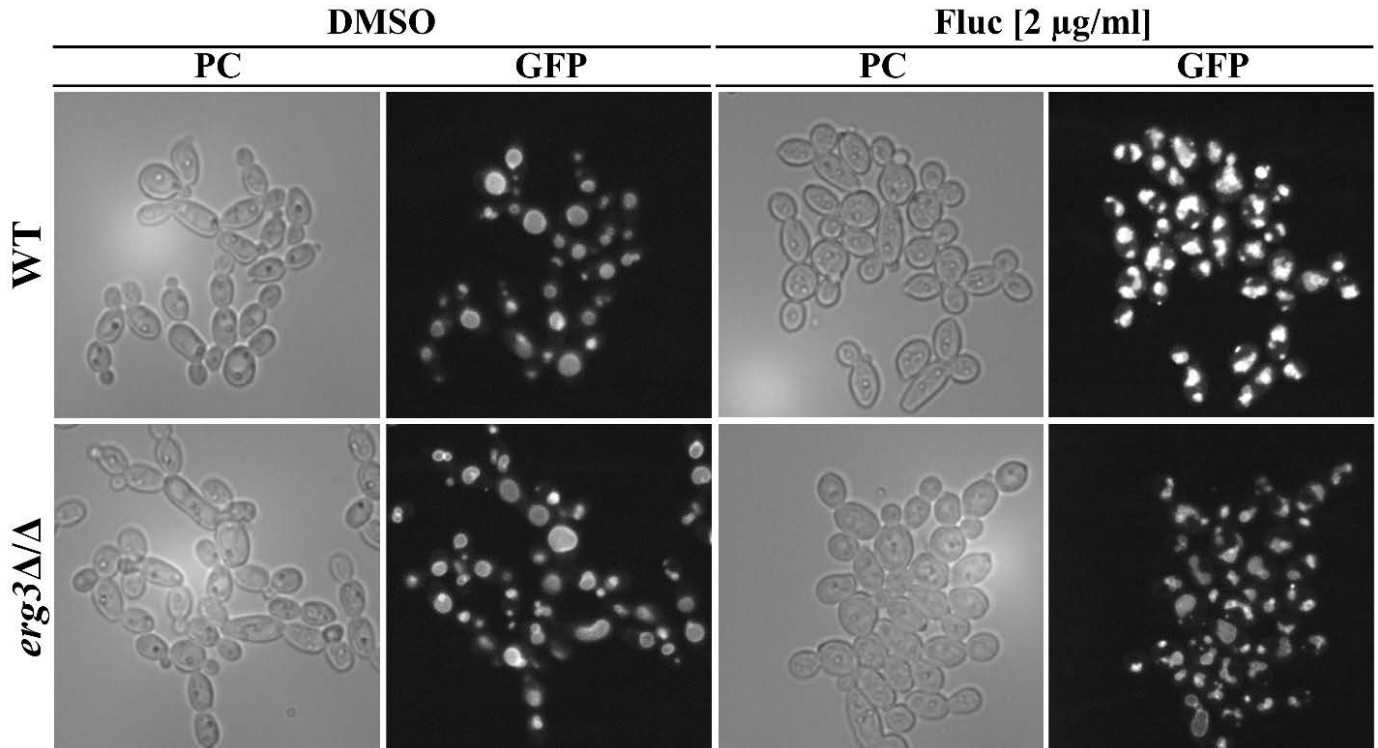

**Supplemental Figure 3. The *Candida albicans* *erg3* $\Delta/\Delta$  mutant exhibits less vacuole fragmentation than wild-type following fluconazole treatment.** The wild-type (WT) strain CAI4 and *erg3* $\Delta/\Delta$  mutant were transformed with plasmid pKE1:GFP-YPT72. The resulting strains were grown overnight in YPD, and subcultured in YNB plus 2  $\mu$ g/ml of fluconazole or 0.5% DMSO. After incubation at 35°C for 8 hours, cells were imaged using a 60X objective. PC, phase contrast.

**Supplemental Table 1.** List of oligonucleotides used in this study.

| <b>Primer</b>              | <b>Sequence (5'-3')</b>                                 |
|----------------------------|---------------------------------------------------------|
| <b>ACT1-FWD-qRT-PCR</b>    | ACGGTGAAGAAGTTGCTGCTTTAGTT                              |
| <b>ACT1prom-ClaI-F</b>     | TGGACA <b><u>ATCGAT</u></b> CCAGCCTCGTTTATAATAAACTTAGTC |
| <b>ACT1-RVS-qRT-PCR</b>    | CGTCGTCACCGGCAAAA                                       |
| <b>ADH1-3'UTRR2-ApaI</b>   | TCATCA <b><u>GGGCC</u></b> CGAAAACCTTGAAACTTGAAAACACC   |
| <b>ADH1term-SpeI-R</b>     | TGACA <b><u>ACTAGT</u></b> GAAAACCTTGAAACTTGAAAACACCG   |
| <b>ARG4DETF7</b>           | TTTTCAACAAAAGCTGTTGCG                                   |
| <b>ARG4DETR7</b>           | ACCAGTAGAATAAGCATCAGC                                   |
| <b>BMR1-F</b>              | ACATAAATACTTTGCCCATCCAGAA                               |
| <b>BMR1-R</b>              | AAGAGTTGGTTTGTAAATCGGCTAAA                              |
| <b>CaCDR1-F qPCR</b>       | ATTCTAAGATGTCGTCGCAAGATG                                |
| <b>CaCDR1-R qPCR</b>       | AGTTCTGGCTAAATTCTGAATGTTTTTC                            |
| <b>CaERG11 FWD qRT-PCR</b> | CCCCTATTAATTTTGTGTTTTCCCTAATTTAC                        |
| <b>CaERG11 RVS qRT-PCR</b> | CACGTTCTCTTCTCAGTTTAATTTCTTTC                           |
| <b>HIS1DETF9</b>           | CATCAAGAGACGAAATAACCC                                   |
| <b>HIS1DETR5</b>           | AAGTAGAGACAGTAGCGGCC                                    |
| <b>LUXINTDETF</b>          | CTGACCTTTAGTCTTTCCTGC                                   |
| <b>LUXINTDETR</b>          | CAGTAGTACTTGTTGTTGTATCG                                 |
| <b>MDR1ORFF-EagI</b>       | TC <b><u>CGGCCG</u></b> ATGCATTACAGATTTTGGAGAG          |
| <b>MDR1ORFR-MluI</b>       | TCA <b><u>ACGCGT</u></b> TATAGGAAAACAATGACACCTC         |
| <b>TEF1prF-BamHI</b>       | TC <b><u>AGGATCCT</u></b> GCAAATCTGTTTGCTGATGG          |

\* Engineered restriction enzyme sites are highlighted in bold text and underlined.

**Supplemental Table 2. List of strains used in this study.**

| Strain                                      | Relevant Genotype                                                                                                | Reference  |
|---------------------------------------------|------------------------------------------------------------------------------------------------------------------|------------|
| BWP17                                       | <i>ura3Δ/Δ his1Δ/Δ arg4Δ/Δ</i>                                                                                   | (1)        |
| CAI4 (“Wild-type”)                          | <i>ura3Δ/Δ HIS1/HIS1 ARG4/ARG4</i>                                                                               | (2)        |
| GP1 (“Wild-type”)                           | <i>ura3Δ/Δ:URA3 his1Δ/Δ:HIS1 arg4Δ/Δ:ARG4</i>                                                                    | (3)        |
| <i>erg3Δ/Δ</i>                              | <i>ura3Δ/Δ:URA3 his1Δ/Δ arg4Δ/Δ erg3Δ:HIS1/erg3Δ:ARG4</i>                                                        | (3)        |
| <i>erg3Δ/Δ + ERG3</i>                       | <i>ura3Δ/Δ:URA3: pr<sub>1000bp</sub>ERG3 his1Δ/Δ arg4Δ/Δ erg3Δ:HIS1/erg3Δ:ARG4</i>                               | (3)        |
| XCTRL (WT <sub>Vector</sub> )               | <i>ura3Δ/Δ:URA3 his1Δ/Δ:HIS1 arg4Δ/Δ:ARG4</i>                                                                    | This study |
| OCDR                                        | <i>ura3Δ/Δ:URA3: P<sub>TEF1</sub>CDR1 his1Δ/Δ:HIS1 arg4Δ/Δ:ARG4</i>                                              | This study |
| OMDR                                        | <i>ura3Δ/Δ:URA3 his1Δ/Δ:HIS1: P<sub>TEF1</sub>MDR1 arg4Δ/Δ:ARG4</i>                                              | This study |
| OERG                                        | <i>ura3Δ/Δ:URA3 his1Δ/Δ:HIS1 arg4Δ/Δ:ARG4: P<sub>TEF1</sub>ERG11</i>                                             | This study |
| OTR                                         | <i>ura3Δ/Δ:URA3: P<sub>TEF1</sub>CDR1 his1Δ/Δ:HIS1: P<sub>TEF1</sub>MDR1 arg4Δ/Δ:ARG4: P<sub>TEF1</sub>ERG11</i> | This study |
| SC5314 (Azole <sup>S</sup> )                | <i>ERG3/ERG3</i>                                                                                                 | (4)        |
| TW2 (Azole <sup>S</sup> )                   | <i>ERG3/ERG3</i>                                                                                                 | (5)        |
| TW17 (Azole <sup>R</sup> )                  | <i>ERG3/ERG3</i>                                                                                                 | (5)        |
| CA12 (Azole <sup>R</sup> )                  | <i>ERG3<sup>W332R</sup>/ERG3<sup>W332R</sup></i>                                                                 | (6)        |
| CA488 (Azole <sup>R</sup> )                 | <i>ERG3<sup>H243N, T330A, A351V</sup>/ERG3<sup>H243N, T330A, A351V</sup></i>                                     | (6)        |
| CA490 (Azole <sup>R</sup> )                 | <i>ERG3<sup>D147G, T330A, A351V</sup>/ERG3<sup>D147G, T330A, A351V</sup></i>                                     | (6)        |
| CA1008 (Azole <sup>R</sup> )                | <i>ERG3<sup>K97E, L193P, V237A, A351V, A353T</sup>/ERG3<sup>K97E, L193P, V237A, A351V, A353T</sup></i>           | (6)        |
| JS7, JS17, JS22, JS23, JS28, JS29, and JS40 | Clinical <i>C. albicans</i> isolates from patients with vaginal candidiasis                                      | Jack Sobel |

Azole<sup>S</sup>: Azole susceptible clinical isolate.

Azole<sup>R</sup>: Azole resistant clinical isolate.

1. Wilson RB, Davis D, Mitchell AP. Rapid hypothesis testing with *Candida albicans* through gene disruption with short homology regions. J Bacteriol. 1996;181(6):1868 - 74.
2. Fonzi WA, Irwin MY. Isogenic strain construction and gene mapping in *Candida albicans*. Genetics. 1993;134(3):717-28.
3. Luna-Tapia A, Willems HME, Parker JE, Tourneau H, Barker KS, Nishimoto AT, et al. Loss of Upc2p-Inducible ERG3 Transcription Is Sufficient To Confer Niche-Specific Azole Resistance without Compromising *Candida albicans* Pathogenicity. MBio. 2018;9(3). Epub 2018/05/24.

4. Maestrone G, Semar R. Establishment and treatment of cutaneous *Candida albicans* infection in the rabbit. *Naturwissenschaften*. 1968;55(2):87-8.
5. White TC. Increased mRNA levels of *ERG16*, *CDR*, and *MDR1* correlate with increases in azole resistance in *Candida albicans* isolates from a patient infected with human immunodeficiency virus. *Antimicrob Agent Chemother*. 1997;41(7):1482-7.
6. Martel CM, Parker JE, Bader O, Weig M, Gross U, Warrilow AG, et al. Identification and characterization of four azole-resistant *erg3* mutants of *Candida albicans*. *Antimicrob Agents Chemother*. 2010;54(11):4527-33. Epub 2010/08/25.
